# Supplementary material for: Detection of the G-quadruplex-TMPyP4 complex by 2-aminopurine modified human telomeric DNA
Source: Royal Society of Chemistry journal article supplement (doi:10.1039/b514526k), 2005-12-08
Supplement: b514526k.pdf [file b514526k.pdf]

## Detection of the G-quadruplex-TMPyP4 Complex by 2-Aminopurine Modified Human Telomeric DNA

Takumi Kimura, Kiyohiko Kawai, Mamoru Fujitsuka and Tetsuro Majima\*

*The Institute of Scientific and Industrial Research, Osaka University  
8-1 Mihogaoka, Ibaraki, Osaka 567-0047, Japan*

### Supplementary Information

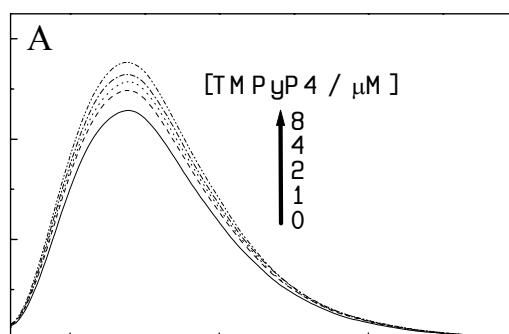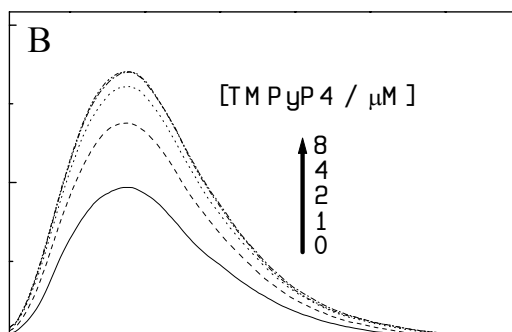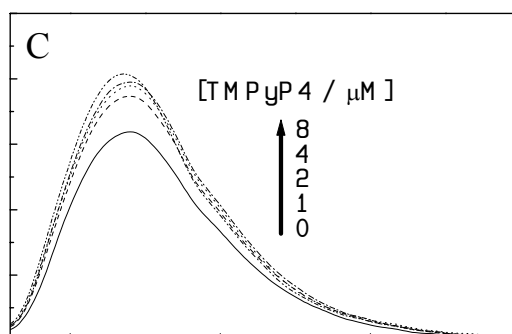

Fig. S1 Fluorescence titration ( $\lambda_{\text{ex}} = 305 \text{ nm}$ ) of Ap modified G-quadruplex; **P7** (A), **P13** (B), and **P19** (C) with TMPyP4 (0, 1, 2, 4, and 8  $\mu\text{M}$ ).

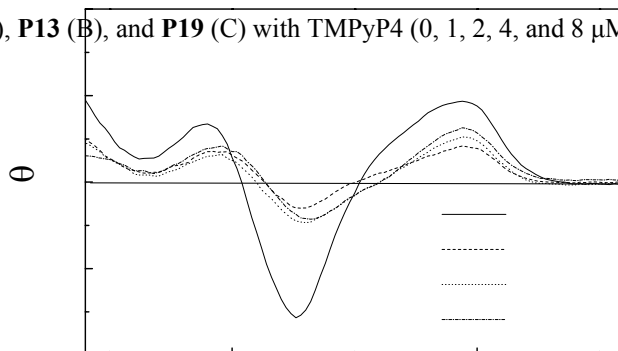

Fig. S2 CD spectra of unmodified and Ap and  $^{\text{d}z}\text{G}$  modified G-quadruplex (**P0**, **PZ7**, **PZ13**, and **PZ19**).

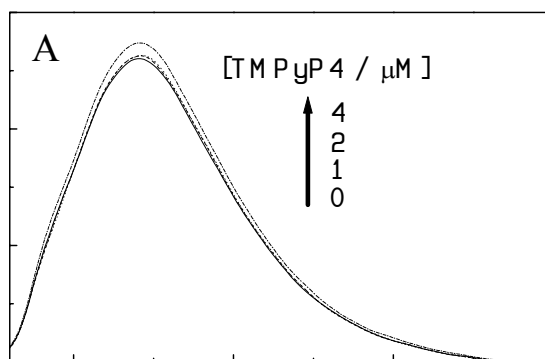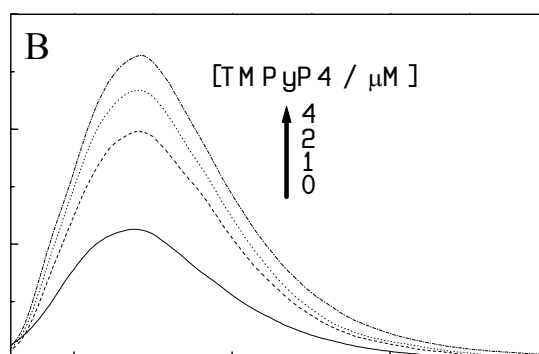

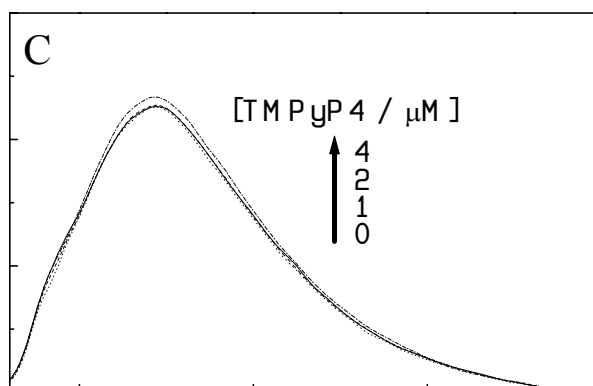

Fig. S3 Fluorescence titration ( $\lambda_{\text{ex}} = 305 \text{ nm}$ ) of Ap and  $^{d^z}\text{G}$  modified G-quadruplex; **PZ7** (A), **PZ13** (B), and **PZ19** (C) with TMPyP4 (0, 1, 2, and 4  $\mu\text{M}$ ).
